# Supplementary material for: GPR87 promotes tumor cell invasion and mediates the immunogenomic landscape of lung adenocarcinoma
Source: PubMed Central journal article supplement (PMC9256611; doi:10.1038/s42003-022-03506-6), 2022-07-05
Supplement: 42003_2022_3506_MOESM2_ESM.pdf [file 42003_2022_3506_MOESM2_ESM.pdf]

## Description of Additional Supplementary Files

**File name:** Supplementary Data 1

**Description:** Differentially expressed genes in patients with high and low expression of GPR87.

**File name:** Supplementary Data 2

**Description:** Source data for meta analysis.
